# Supplementary material for: Prediction of Functionally Important Phospho-Regulatory Events in Xenopus laevis Oocytes
Source: PubMed Central journal article supplement (PMC4552029; doi:10.1371/journal.pcbi.1004362), 2015-08-27

## Plk1 10-fold cross-validation

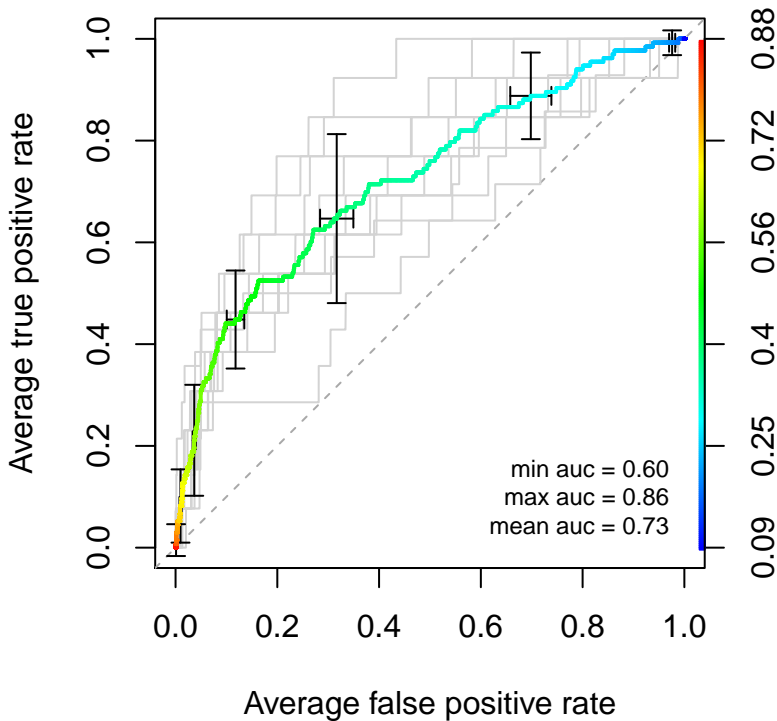

## Plk2 10-fold cross-validation

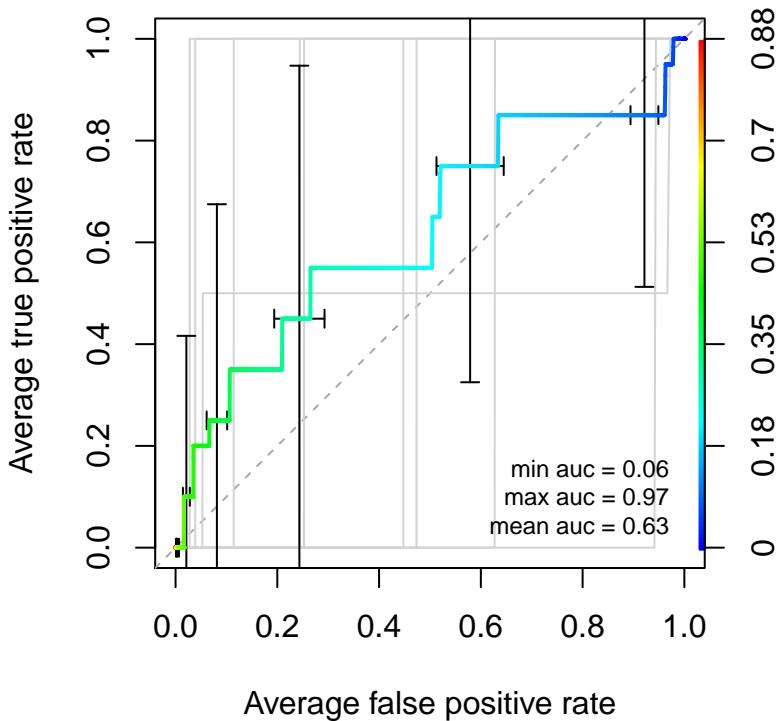

## Plk3 10-fold cross-validation

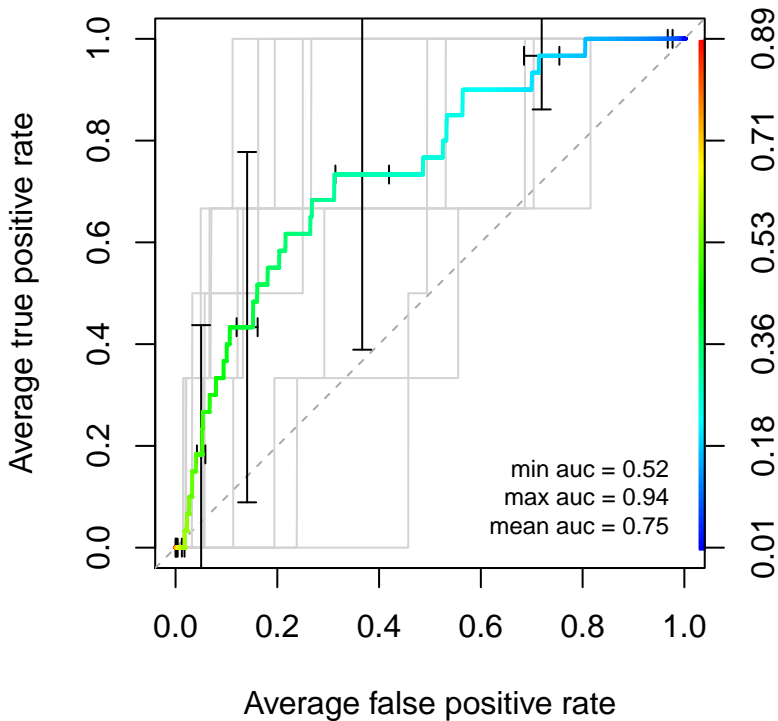

## Chk1 10-fold cross-validation

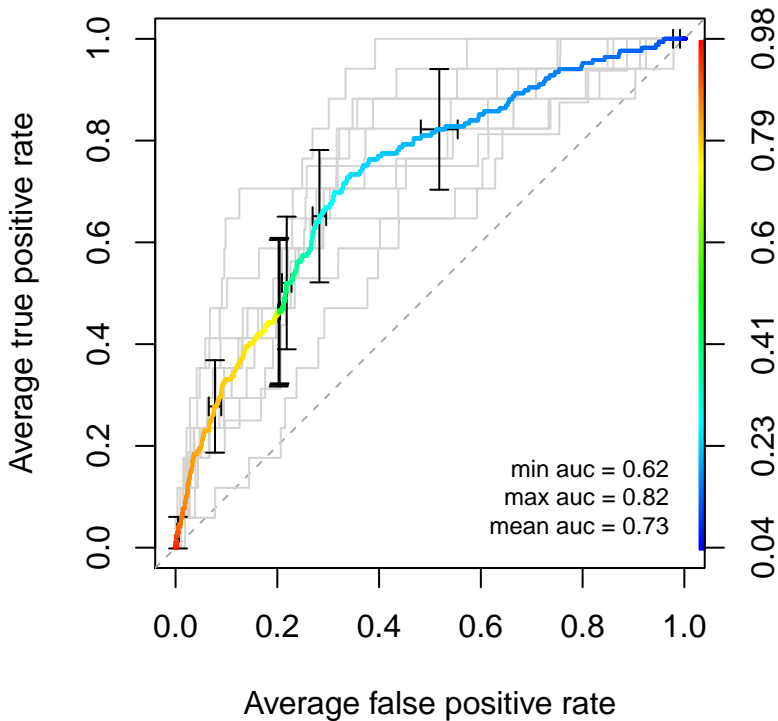

## Cdk1 10-fold cross-validation

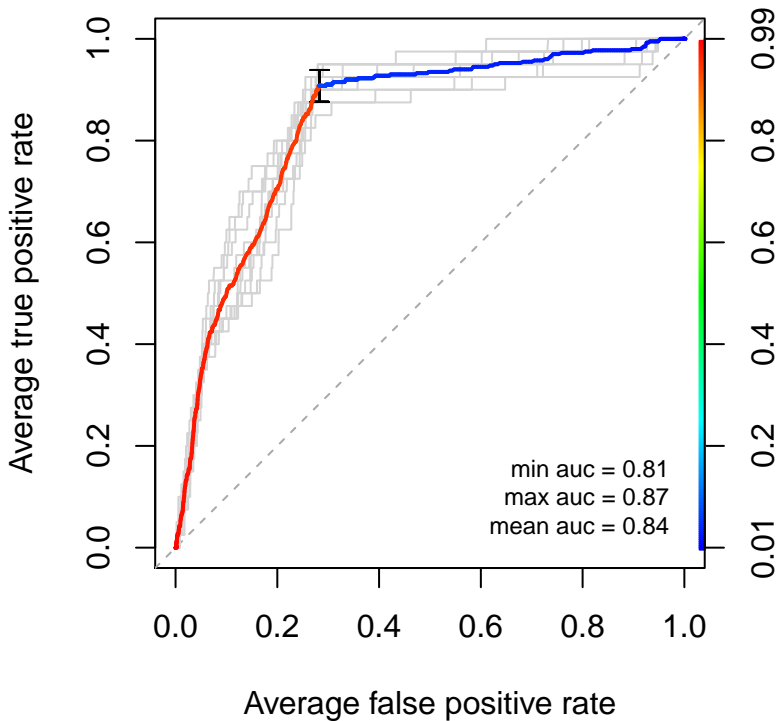

## Cdk2 10-fold cross-validation

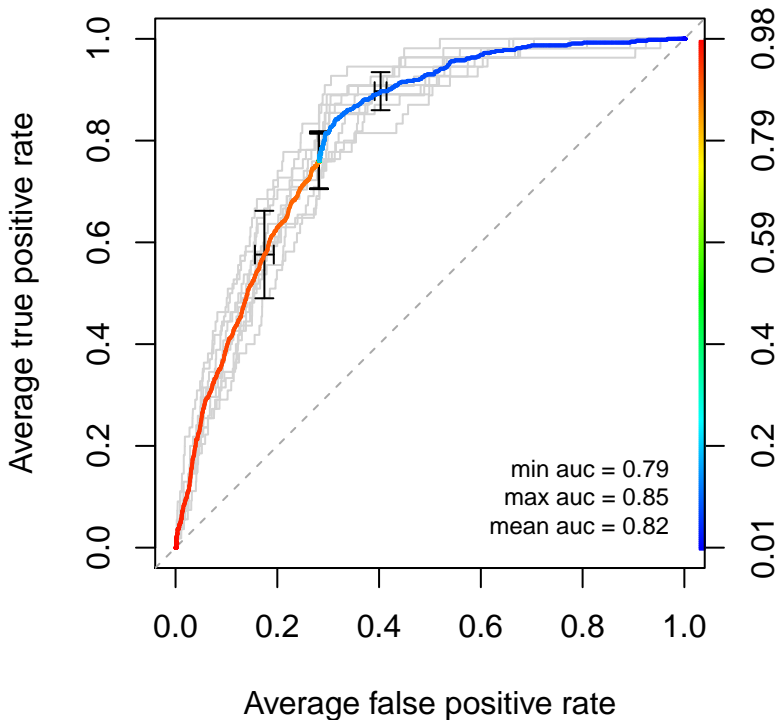

## Cdk3 10-fold cross-validation

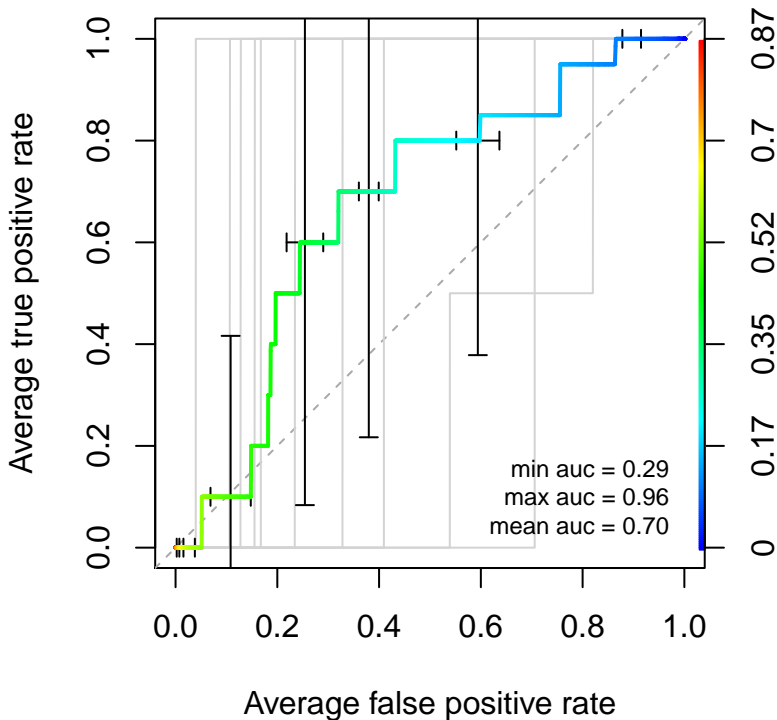

## Cdk7 10-fold cross-validation

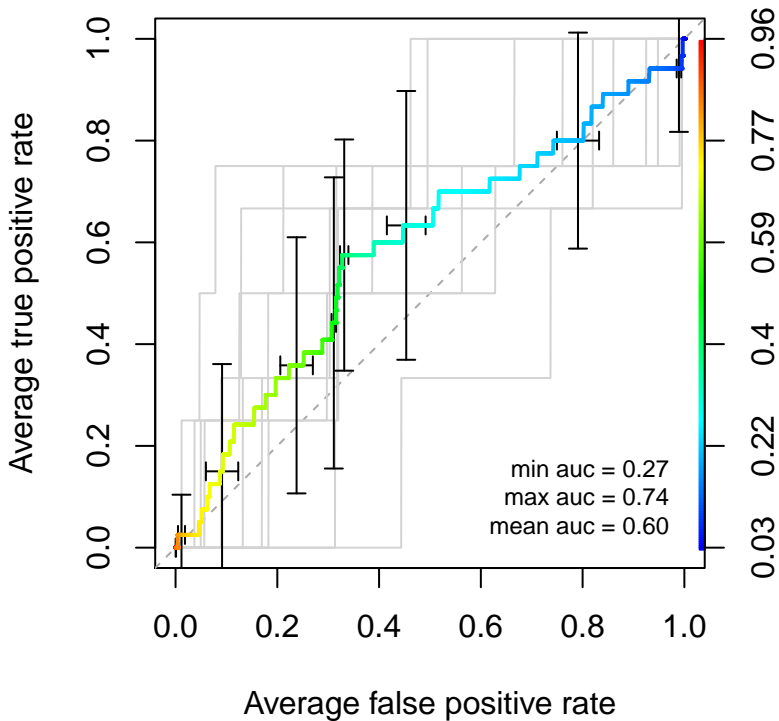



## AurB 10-fold cross-validation

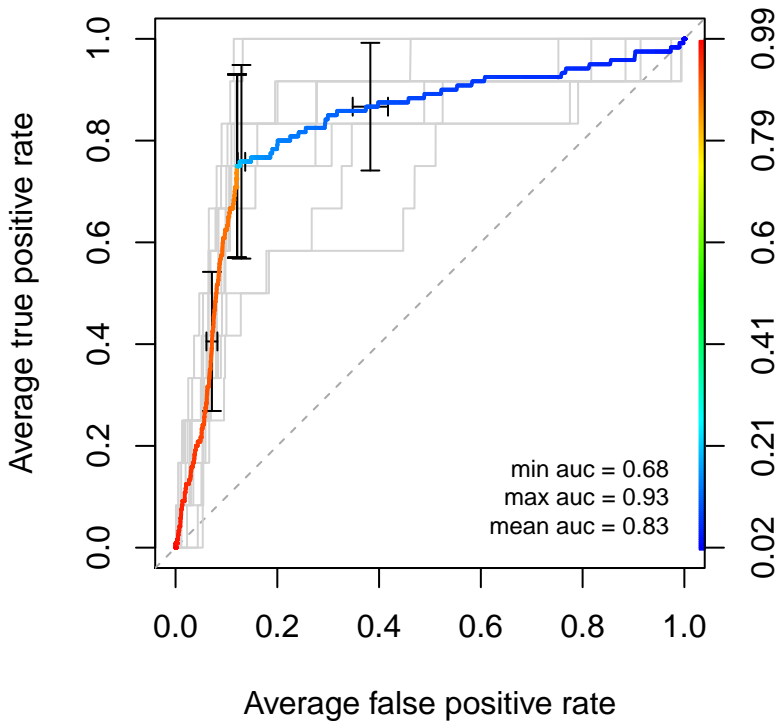

## AurA 10-fold cross-validation

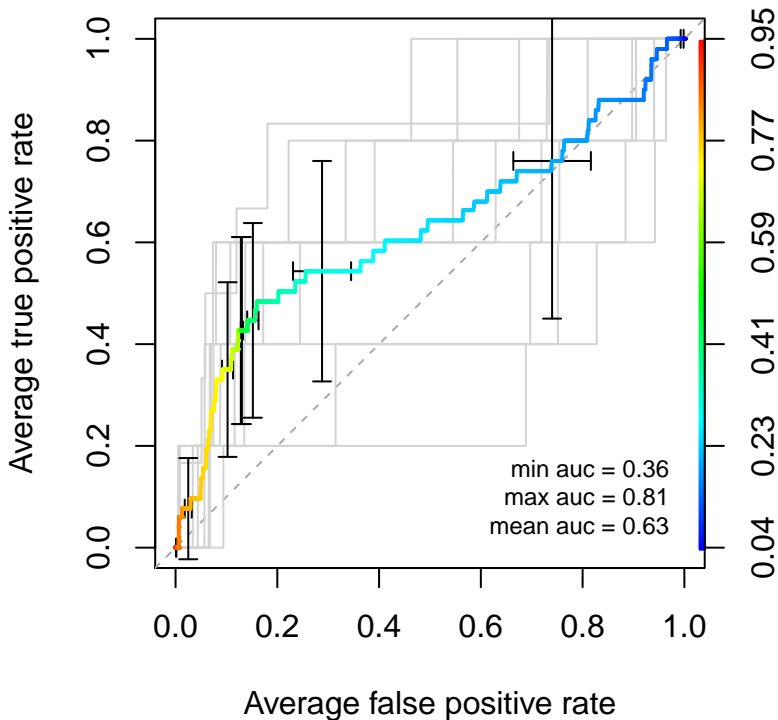

## Atr 10-fold cross-validation

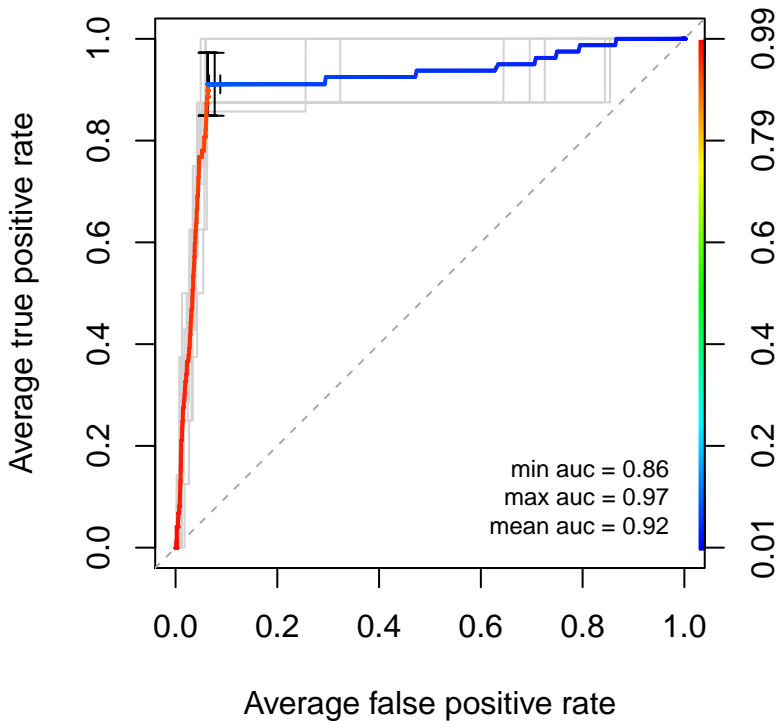

## Akt 10-fold cross-validation

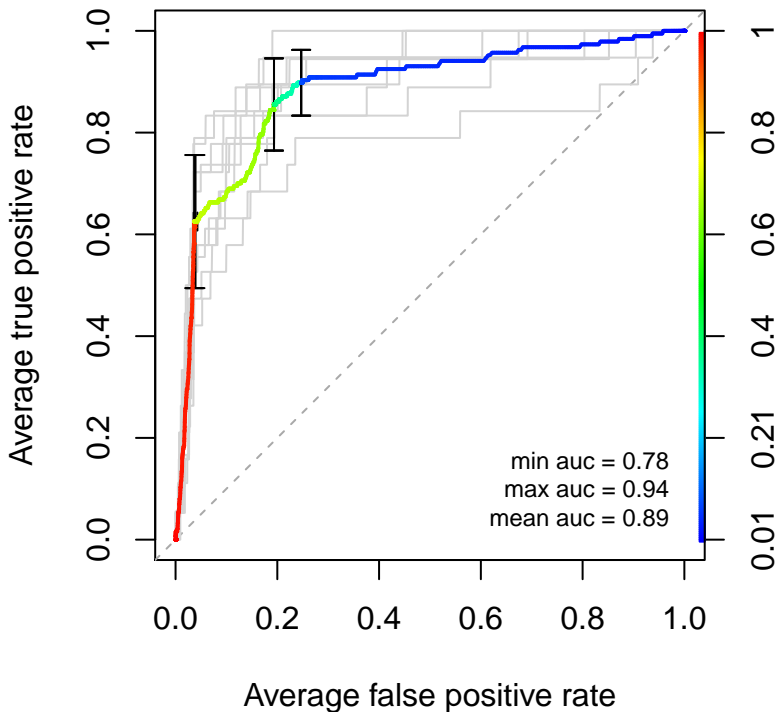

## Nek2 10-fold cross-validation

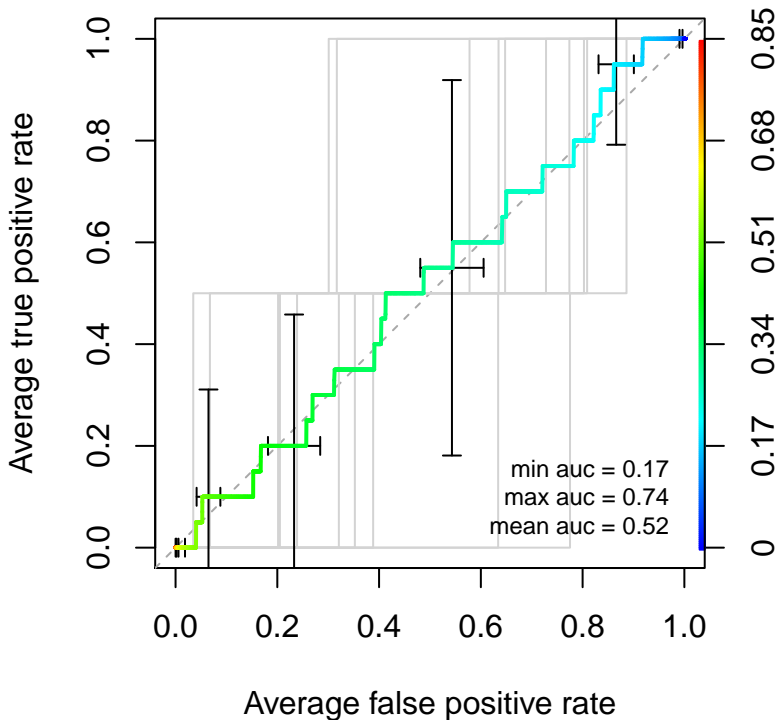

## Nek6 10-fold cross-validation

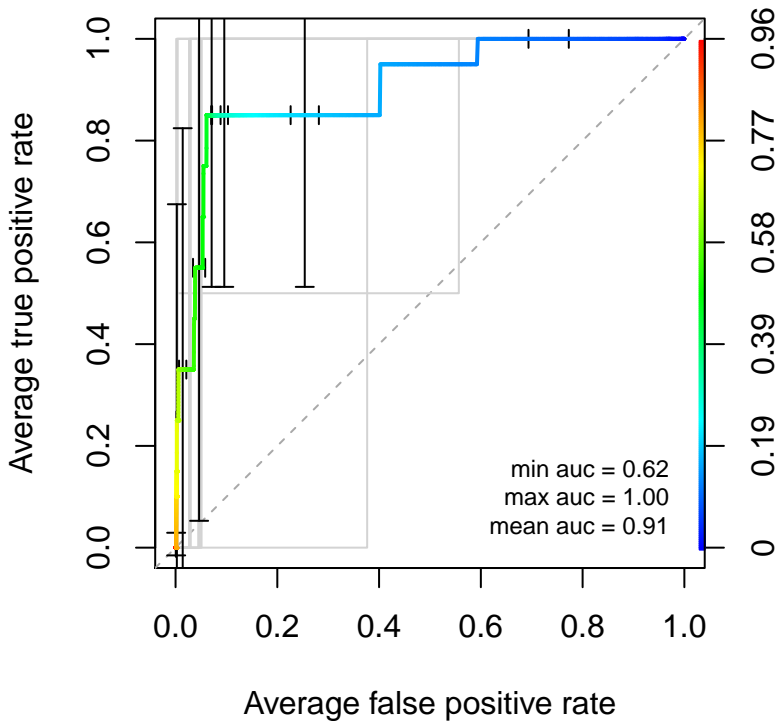

## Nek9 10-fold cross-validation

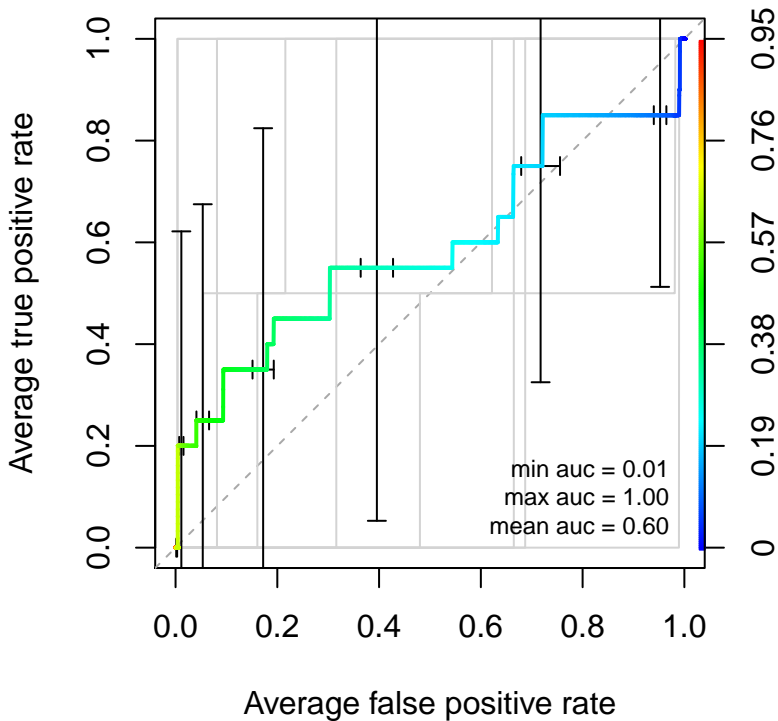

## Ttk 10-fold cross-validation

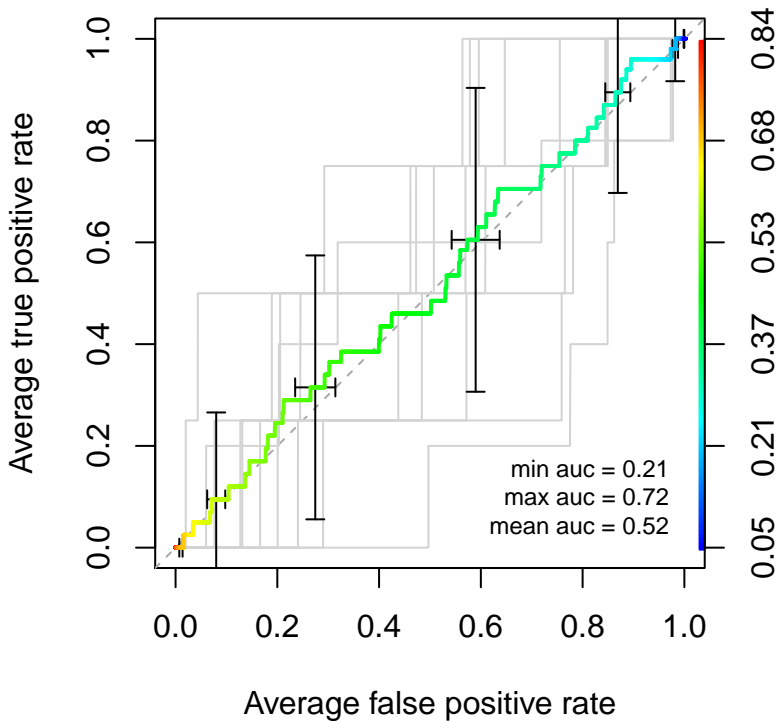

Supplement: pcbi.1004362.s002.pdf [file pcbi.1004362.s002.pdf]
