# Supplementary material for: Prediction of Functionally Important Phospho-Regulatory Events in Xenopus laevis Oocytes
Source: PubMed Central journal article supplement (PMC4552029; doi:10.1371/journal.pcbi.1004362), 2015-08-27

## All sites

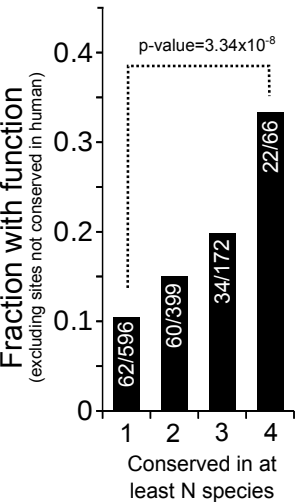

## Disordered

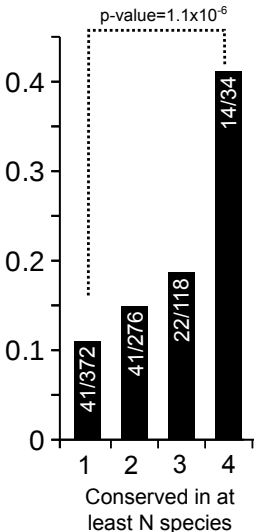

## Ordered

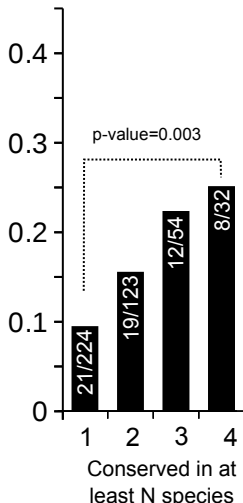

Supplement: pcbi.1004362.s001.pdf [file pcbi.1004362.s001.pdf]
